# Supplementary material for: In vivo therapeutic effect of combination treatment with metformin and Scutellaria baicalensis on maintaining bile acid homeostasis
Source: PLoS One. 2017 Sep 6;12(9):e0182467. doi: 10.1371/journal.pone.0182467 (PMC5587228; doi:10.1371/journal.pone.0182467)
Supplement: S4 Dataset — (XLSX) [file pone.0182467.s004.xlsx]

## Sheet: phylum
# Constructed from biom file
#OTU ID	HG1	HG2	HG3	HG4	HG5	LETO1	LETO2	LETO3	LETO4	LETO5	Met1	Met2	Met3	Met4	Met5	OLETF1	OLETF2	OLETF3	OLETF4	OLETF5
Unassigned;Other	0.0230398	0.00111483	0.00706057	0.00334448	0.00483092	0.00445931	0.0111483	0.0107767	0.00706057	0.00557414	0.00483092	0.0278707	0.0126347	0.00743218	0.00483092	0.00520253	0.0107767	0.0156076	0.00520253	0.00445931
k__Bacteria;Other	0	0	0	0	0.000371609	0	0	0	0	0	0	0	0	0	0.000371609	0	0	0	0	0
k__Bacteria;p__Actinobacteria	0.000371609	0	0	0	0	0	0	0.000743218	0.000371609	0.00111483	0	0	0	0	0	0	0	0	0	0.000371609
k__Bacteria;p__Bacteroidetes	0.795243	0.641397	0.73913	0.798216	0.727611	0.638053	0.538833	0.603865	0.72055	0.647715	0.773318	0.631735	0.759569	0.70903	0.712003	0.717577	0.829431	0.682274	0.562616	0.770717
k__Bacteria;p__Deferribacteres	0	0	0	0	0	0.0040877	0.00222965	0.000371609	0	0	0	0	0	0	0.000743218	0.000371609	0	0.00185805	0.000371609	0.0081754
k__Bacteria;p__Firmicutes	0.149015	0.352285	0.246005	0.193608	0.263099	0.352657	0.444444	0.362319	0.267187	0.343738	0.202527	0.33482	0.218506	0.277592	0.27016	0.271275	0.149015	0.295058	0.426607	0.214047
k__Bacteria;p__Fusobacteria	0	0	0	0	0	0	0	0	0	0	0.000371609	0	0	0	0	0	0	0	0	0
k__Bacteria;p__Proteobacteria	0.0282423	0.00222965	0.00631735	0.00185805	0.00371609	0.000743218	0.00334448	0.0189521	0.00148644	0.00185805	0.0178372	0.0040877	0.00929023	0.00483092	0.0115199	0.00371609	0.00222965	0.00260126	0.000743218	0.00111483
k__Bacteria;p__Spirochaetes	0	0	0	0	0	0	0	0	0	0	0	0.000371609	0	0.000371609	0.000371609	0	0	0	0	0
k__Bacteria;p__Tenericutes	0.00222965	0.00297287	0.00148644	0.00297287	0.000371609	0	0	0.00297287	0.00334448	0	0.000743218	0.00111483	0	0.000743218	0	0.00111483	0.00854701	0.00260126	0.00445931	0.00111483
k__Bacteria;p__Verrucomicrobia	0.00185805	0	0	0	0	0	0	0	0	0	0.000371609	0	0	0	0	0.000743218	0	0	0	0

## Sheet: class
# Constructed from biom file
#OTU ID	HG1	HG2	HG3	HG4	HG5	LETO1	LETO2	LETO3	LETO4	LETO5	Met1	Met2	Met3	Met4	Met5	OLETF1	OLETF2	OLETF3	OLETF4	OLETF5
Unassigned;Other;Other	0.0230398	0.00111483	0.00706057	0.00334448	0.00483092	0.00445931	0.0111483	0.0107767	0.00706057	0.00557414	0.00483092	0.0278707	0.0126347	0.00743218	0.00483092	0.00520253	0.0107767	0.0156076	0.00520253	0.00445931
k__Bacteria;Other;Other	0	0	0	0	0.000371609	0	0	0	0	0	0	0	0	0	0.000371609	0	0	0	0	0
k__Bacteria;p__Actinobacteria;c__Actinobacteria	0	0	0	0	0	0	0	0	0	0	0	0	0	0	0	0	0	0	0	0.000371609
k__Bacteria;p__Actinobacteria;c__Coriobacteriia	0.000371609	0	0	0	0	0	0	0.000743218	0.000371609	0.00111483	0	0	0	0	0	0	0	0	0	0
k__Bacteria;p__Bacteroidetes;c__Bacteroidia	0.795243	0.641397	0.73913	0.798216	0.727611	0.638053	0.538833	0.603865	0.72055	0.647715	0.773318	0.631735	0.759569	0.70903	0.712003	0.717577	0.829431	0.682274	0.562616	0.770717
k__Bacteria;p__Deferribacteres;c__Deferribacteres	0	0	0	0	0	0.0040877	0.00222965	0.000371609	0	0	0	0	0	0	0.000743218	0.000371609	0	0.00185805	0.000371609	0.0081754
k__Bacteria;p__Firmicutes;c__Bacilli	0.00668896	0.0189521	0.0133779	0.00594575	0.0159792	0.00297287	0.00891862	0.00743218	0.00371609	0.00966184	0.00371609	0.00260126	0.00260126	0.0527685	0.00334448	0.00780379	0.00631735	0.00297287	0.00631735	0.00445931
k__Bacteria;p__Firmicutes;c__Clostridia	0.135637	0.332219	0.232256	0.187291	0.245634	0.349313	0.432925	0.3534	0.262356	0.327388	0.196581	0.332219	0.215533	0.220736	0.265329	0.262356	0.142326	0.291342	0.419918	0.208101
k__Bacteria;p__Firmicutes;c__Erysipelotrichi	0.00668896	0.00111483	0.000371609	0.000371609	0.00148644	0.000371609	0.00260126	0.00148644	0.00111483	0.00668896	0.00222965	0	0.000371609	0.0040877	0.00148644	0.00111483	0.000371609	0.000743218	0.000371609	0.00148644
k__Bacteria;p__Fusobacteria;c__Fusobacteriia	0	0	0	0	0	0	0	0	0	0	0.000371609	0	0	0	0	0	0	0	0	0
k__Bacteria;p__Proteobacteria;c__Alphaproteobacteria	0.00371609	0.00148644	0.00297287	0.000371609	0.00260126	0	0.00185805	0.0178372	0	0	0.00148644	0.00222965	0.00148644	0.00334448	0.000371609	0	0	0	0	0
k__Bacteria;p__Proteobacteria;c__Betaproteobacteria	0.0241546	0	0.00334448	0.00148644	0.000743218	0.000743218	0.000371609	0.000743218	0.00111483	0.00148644	0.0148644	0.000743218	0	0.000371609	0.0107767	0.00334448	0.000743218	0.000743218	0	0.00111483
k__Bacteria;p__Proteobacteria;c__Deltaproteobacteria	0	0.000743218	0	0	0	0	0	0.000371609	0.000371609	0.000371609	0.00111483	0.000743218	0.00743218	0.000743218	0	0.000371609	0.000743218	0.00185805	0.000371609	0
k__Bacteria;p__Proteobacteria;c__Gammaproteobacteria	0.000371609	0	0	0	0.000371609	0	0.00111483	0	0	0	0.000371609	0.000371609	0.000371609	0.000371609	0.000371609	0	0.000743218	0	0.000371609	0
k__Bacteria;p__Spirochaetes;c__Spirochaetes	0	0	0	0	0	0	0	0	0	0	0	0.000371609	0	0.000371609	0.000371609	0	0	0	0	0
k__Bacteria;p__Tenericutes;c__Mollicutes	0.00222965	0.00297287	0.00148644	0.00297287	0.000371609	0	0	0.00297287	0.00334448	0	0.000743218	0.00111483	0	0.000743218	0	0.00111483	0.00854701	0.00260126	0.00445931	0.00111483
k__Bacteria;p__Verrucomicrobia;c__Verrucomicrobiae	0.00185805	0	0	0	0	0	0	0	0	0	0.000371609	0	0	0	0	0.000743218	0	0	0	0

## Sheet: order
# Constructed from biom file
#OTU ID	HG1	HG2	HG3	HG4	HG5	LETO1	LETO2	LETO3	LETO4	LETO5	Met1	Met2	Met3	Met4	Met5	OLETF1	OLETF2	OLETF3	OLETF4	OLETF5
Unassigned;Other;Other;Other	0.0230398	0.00111483	0.00706057	0.00334448	0.00483092	0.00445931	0.0111483	0.0107767	0.00706057	0.00557414	0.00483092	0.0278707	0.0126347	0.00743218	0.00483092	0.00520253	0.0107767	0.0156076	0.00520253	0.00445931
k__Bacteria;Other;Other;Other	0	0	0	0	0.000371609	0	0	0	0	0	0	0	0	0	0.000371609	0	0	0	0	0
k__Bacteria;p__Actinobacteria;c__Actinobacteria;o__Actinomycetales	0	0	0	0	0	0	0	0	0	0	0	0	0	0	0	0	0	0	0	0.000371609
k__Bacteria;p__Actinobacteria;c__Coriobacteriia;o__Coriobacteriales	0.000371609	0	0	0	0	0	0	0.000743218	0.000371609	0.00111483	0	0	0	0	0	0	0	0	0	0
k__Bacteria;p__Bacteroidetes;c__Bacteroidia;o__Bacteroidales	0.795243	0.641397	0.73913	0.798216	0.727611	0.638053	0.538833	0.603865	0.72055	0.647715	0.773318	0.631735	0.759569	0.70903	0.712003	0.717577	0.829431	0.682274	0.562616	0.770717
k__Bacteria;p__Deferribacteres;c__Deferribacteres;o__Deferribacterales	0	0	0	0	0	0.0040877	0.00222965	0.000371609	0	0	0	0	0	0	0.000743218	0.000371609	0	0.00185805	0.000371609	0.0081754
k__Bacteria;p__Firmicutes;c__Bacilli;o__Bacillales	0	0	0.00334448	0	0.000743218	0	0.00148644	0.0040877	0	0	0	0.000743218	0	0.00222965	0.000371609	0.000743218	0.000371609	0.000371609	0.000371609	0.000371609
k__Bacteria;p__Firmicutes;c__Bacilli;o__Lactobacillales	0.00557414	0.0159792	0.00445931	0.00185805	0.00483092	0.00297287	0.00706057	0.00334448	0.00371609	0.00929023	0.00185805	0.00148644	0.00148644	0.00594575	0.00297287	0.00668896	0.00594575	0.00260126	0.00520253	0.00371609
k__Bacteria;p__Firmicutes;c__Bacilli;o__Turicibacterales	0.00111483	0.00297287	0.00557414	0.0040877	0.0104051	0	0.000371609	0	0	0.000371609	0.00185805	0.000371609	0.00111483	0.0445931	0	0.000371609	0	0	0.000743218	0.000371609
k__Bacteria;p__Firmicutes;c__Clostridia;o__Clostridiales	0.135637	0.332219	0.232256	0.187291	0.245634	0.349313	0.432925	0.3534	0.262356	0.327388	0.196581	0.332219	0.215533	0.220736	0.265329	0.262356	0.142326	0.291342	0.419918	0.208101
k__Bacteria;p__Firmicutes;c__Erysipelotrichi;o__Erysipelotrichales	0.00668896	0.00111483	0.000371609	0.000371609	0.00148644	0.000371609	0.00260126	0.00148644	0.00111483	0.00668896	0.00222965	0	0.000371609	0.0040877	0.00148644	0.00111483	0.000371609	0.000743218	0.000371609	0.00148644
k__Bacteria;p__Fusobacteria;c__Fusobacteriia;o__Fusobacteriales	0	0	0	0	0	0	0	0	0	0	0.000371609	0	0	0	0	0	0	0	0	0
k__Bacteria;p__Proteobacteria;c__Alphaproteobacteria;o__RF32	0.00371609	0.00148644	0.00297287	0.000371609	0.00260126	0	0.00185805	0.0178372	0	0	0.00148644	0.00222965	0.00148644	0.00334448	0.000371609	0	0	0	0	0
k__Bacteria;p__Proteobacteria;c__Betaproteobacteria;o__Burkholderiales	0.0241546	0	0.00334448	0.00148644	0.000743218	0.000743218	0.000371609	0.000743218	0.00111483	0.00148644	0.0148644	0.000743218	0	0.000371609	0.0107767	0.00334448	0.000743218	0.000743218	0	0.00111483
k__Bacteria;p__Proteobacteria;c__Deltaproteobacteria;o__Desulfovibrionales	0	0.000743218	0	0	0	0	0	0.000371609	0.000371609	0.000371609	0.00111483	0.000743218	0.00743218	0.000743218	0	0.000371609	0.000743218	0.00185805	0.000371609	0
k__Bacteria;p__Proteobacteria;c__Gammaproteobacteria;o__Enterobacteriales	0.000371609	0	0	0	0.000371609	0	0.00111483	0	0	0	0.000371609	0.000371609	0.000371609	0.000371609	0.000371609	0	0.000743218	0	0.000371609	0
k__Bacteria;p__Spirochaetes;c__Spirochaetes;o__Spirochaetales	0	0	0	0	0	0	0	0	0	0	0	0.000371609	0	0.000371609	0.000371609	0	0	0	0	0
k__Bacteria;p__Tenericutes;c__Mollicutes;o__RF39	0.00222965	0.00297287	0.00148644	0.00297287	0.000371609	0	0	0.00297287	0.00334448	0	0.000743218	0.00111483	0	0.000743218	0	0.00111483	0.00854701	0.00260126	0.00445931	0.00111483
k__Bacteria;p__Verrucomicrobia;c__Verrucomicrobiae;o__Verrucomicrobiales	0.00185805	0	0	0	0	0	0	0	0	0	0.000371609	0	0	0	0	0.000743218	0	0	0	0

## Sheet: family
# Constructed from biom file
#OTU ID	HG1	HG2	HG3	HG4	HG5	LETO1	LETO2	LETO3	LETO4	LETO5	Met1	Met2	Met3	Met4	Met5	OLETF1	OLETF2	OLETF3	OLETF4	OLETF5
Unassigned;Other;Other;Other;Other	0.0230398	0.00111483	0.00706057	0.00334448	0.00483092	0.00445931	0.0111483	0.0107767	0.00706057	0.00557414	0.00483092	0.0278707	0.0126347	0.00743218	0.00483092	0.00520253	0.0107767	0.0156076	0.00520253	0.00445931
k__Bacteria;Other;Other;Other;Other	0	0	0	0	0.000371609	0	0	0	0	0	0	0	0	0	0.000371609	0	0	0	0	0
k__Bacteria;p__Actinobacteria;c__Actinobacteria;o__Actinomycetales;f__Corynebacteriaceae	0	0	0	0	0	0	0	0	0	0	0	0	0	0	0	0	0	0	0	0.000371609
k__Bacteria;p__Actinobacteria;c__Coriobacteriia;o__Coriobacteriales;f__Coriobacteriaceae	0.000371609	0	0	0	0	0	0	0.000743218	0.000371609	0.00111483	0	0	0	0	0	0	0	0	0	0
k__Bacteria;p__Bacteroidetes;c__Bacteroidia;o__Bacteroidales;Other	0	0	0	0.000371609	0	0	0	0	0	0.000371609	0	0	0	0	0	0.000371609	0	0.000743218	0	0
k__Bacteria;p__Bacteroidetes;c__Bacteroidia;o__Bacteroidales;f__	0.0100334	0.00222965	0.00371609	0.00111483	0.000743218	0.000371609	0.000371609	0.00111483	0	0.000371609	0.00111483	0	0.000371609	0.000743218	0.000371609	0.00148644	0	0.00334448	0.00222965	0.000371609
k__Bacteria;p__Bacteroidetes;c__Bacteroidia;o__Bacteroidales;f__Bacteroidaceae	0.332219	0.0746934	0.0490524	0.0208101	0.200297	0.205128	0.331475	0.250465	0.187663	0.301375	0.157562	0.0274991	0.0572278	0.0672612	0.183203	0.2932	0.111483	0.328131	0.0906726	0.0795243
k__Bacteria;p__Bacteroidetes;c__Bacteroidia;o__Bacteroidales;f__Porphyromonadaceae	0.0445931	0.00185805	0.00260126	0.000371609	0.000371609	0.00111483	0.00445931	0.00557414	0.00185805	0.00260126	0.00185805	0.00185805	0.00297287	0.00520253	0.00222965	0.00297287	0.00111483	0.00371609	0	0.000371609
k__Bacteria;p__Bacteroidetes;c__Bacteroidia;o__Bacteroidales;f__Prevotellaceae	0.0204385	0.0598291	0.0509104	0.047566	0.0821256	0.000743218	0.0178372	0.0713489	0.00966184	0.0118915	0.0248978	0.0650316	0.0371609	0.0813824	0.0185805	0.112969	0.0319584	0.0549981	0.0464511	0.0215533
k__Bacteria;p__Bacteroidetes;c__Bacteroidia;o__Bacteroidales;f__Rikenellaceae	0.00334448	0.0081754	0.00148644	0.00594575	0.00966184	0.0081754	0.00148644	0.0156076	0.00185805	0.00222965	0.00185805	0.00185805	0.0174656	0.0141211	0.00743218	0.00483092	0.00557414	0.017094	0.0107767	0.00706057
k__Bacteria;p__Bacteroidetes;c__Bacteroidia;o__Bacteroidales;f__S24-7	0.379041	0.49424	0.629506	0.720922	0.433296	0.422148	0.183203	0.258268	0.519509	0.328874	0.586027	0.533259	0.642512	0.538462	0.499071	0.299889	0.677072	0.27016	0.411371	0.659978
k__Bacteria;p__Bacteroidetes;c__Bacteroidia;o__Bacteroidales;f__[Odoribacteraceae]	0.00520253	0.000371609	0.00185805	0.00111483	0.00111483	0.000371609	0	0.00148644	0	0	0	0.00222965	0.00185805	0.00148644	0.00111483	0.00185805	0.00222965	0.0040877	0.00111483	0.00148644
k__Bacteria;p__Bacteroidetes;c__Bacteroidia;o__Bacteroidales;f__[Paraprevotellaceae]	0.000371609	0	0	0	0	0	0	0	0	0	0	0	0	0	0	0	0	0	0	0.000371609
k__Bacteria;p__Bacteroidetes;c__Bacteroidia;o__Bacteroidales;f__p-2534-18B5	0	0	0	0	0	0	0	0	0	0	0	0	0	0.000371609	0	0	0	0	0	0
k__Bacteria;p__Deferribacteres;c__Deferribacteres;o__Deferribacterales;f__Deferribacteraceae	0	0	0	0	0	0.0040877	0.00222965	0.000371609	0	0	0	0	0	0	0.000743218	0.000371609	0	0.00185805	0.000371609	0.0081754
k__Bacteria;p__Firmicutes;c__Bacilli;o__Bacillales;f__Bacillaceae	0	0	0.00334448	0	0.000743218	0	0.00148644	0.0040877	0	0	0	0	0	0.00111483	0	0.000371609	0	0.000371609	0	0
k__Bacteria;p__Firmicutes;c__Bacilli;o__Bacillales;f__Planococcaceae	0	0	0	0	0	0	0	0	0	0	0	0.000743218	0	0.00111483	0.000371609	0.000371609	0.000371609	0	0.000371609	0.000371609
k__Bacteria;p__Firmicutes;c__Bacilli;o__Lactobacillales;f__Lactobacillaceae	0.00520253	0.0159792	0.00445931	0.00185805	0.00483092	0.00297287	0.00631735	0.00334448	0.00371609	0.00891862	0.00185805	0.00111483	0.00148644	0.00594575	0.00297287	0.00668896	0.00594575	0.00260126	0.00520253	0.00334448
k__Bacteria;p__Firmicutes;c__Bacilli;o__Lactobacillales;f__Streptococcaceae	0.000371609	0	0	0	0	0	0.000743218	0	0	0.000371609	0	0.000371609	0	0	0	0	0	0	0	0.000371609
k__Bacteria;p__Firmicutes;c__Bacilli;o__Turicibacterales;f__Turicibacteraceae	0.00111483	0.00297287	0.00557414	0.0040877	0.0104051	0	0.000371609	0	0	0.000371609	0.00185805	0.000371609	0.00111483	0.0445931	0	0.000371609	0	0	0.000743218	0.000371609
k__Bacteria;p__Firmicutes;c__Clostridia;o__Clostridiales;Other	0.00371609	0.114827	0.0252694	0.0917874	0.000743218	0.00334448	0.00706057	0.00966184	0.00706057	0.00185805	0.00334448	0.132664	0.0230398	0.0460795	0.00222965	0.0104051	0.00111483	0.03233	0.0040877	0.00148644
k__Bacteria;p__Firmicutes;c__Clostridia;o__Clostridiales;f__	0.0431067	0.0981048	0.0869565	0.0364177	0.0587142	0.171312	0.0743218	0.190635	0.0434783	0.0572278	0.0654032	0.0992196	0.0505388	0.0405054	0.0509104	0.092159	0.0672612	0.128577	0.150502	0.0865849
k__Bacteria;p__Firmicutes;c__Clostridia;o__Clostridiales;f__Christensenellaceae	0.00743218	0.00148644	0.000743218	0.000371609	0.00148644	0.00891862	0.0104051	0.00929023	0.00148644	0.00483092	0.00111483	0.00222965	0.00260126	0.00148644	0.00483092	0.00743218	0.000743218	0.00260126	0.00371609	0.000743218
k__Bacteria;p__Firmicutes;c__Clostridia;o__Clostridiales;f__Clostridiaceae	0.0104051	0.0520253	0.0765515	0.0189521	0.0568562	0.00891862	0.00520253	0.00297287	0.000371609	0.00334448	0.0605723	0.00445931	0.00780379	0.0813824	0.0706057	0.0104051	0.0100334	0.00743218	0.0483092	0.00371609
k__Bacteria;p__Firmicutes;c__Clostridia;o__Clostridiales;f__Dehalobacteriaceae	0	0	0	0.000743218	0.000371609	0	0	0.000371609	0	0	0.000371609	0	0	0.00148644	0.000371609	0	0	0.000371609	0	0
k__Bacteria;p__Firmicutes;c__Clostridia;o__Clostridiales;f__Lachnospiraceae	0.00668896	0.015236	0.00706057	0.0130063	0.0460795	0.0538833	0.10628	0.0479376	0.0787811	0.22408	0.0252694	0.0226682	0.0241546	0.0126347	0.0193237	0.00854701	0.0215533	0.0330732	0.0754366	0.00520253
k__Bacteria;p__Firmicutes;c__Clostridia;o__Clostridiales;f__Peptococcaceae	0	0	0.00148644	0	0.00111483	0.00185805	0.0040877	0.00185805	0.00111483	0.00111483	0	0.000743218	0	0.000743218	0	0	0	0.000371609	0	0
k__Bacteria;p__Firmicutes;c__Clostridia;o__Clostridiales;f__Peptostreptococcaceae	0	0.000371609	0	0	0	0	0	0	0	0	0.000371609	0	0	0.000371609	0.000743218	0	0	0	0	0
k__Bacteria;p__Firmicutes;c__Clostridia;o__Clostridiales;f__Ruminococcaceae	0.0642884	0.0501672	0.0334448	0.0260126	0.0795243	0.101078	0.225195	0.0906726	0.130063	0.0349313	0.0401338	0.0702341	0.107395	0.0360461	0.116314	0.133408	0.0416202	0.0865849	0.137124	0.110368
k__Bacteria;p__Firmicutes;c__Clostridia;o__Clostridiales;f__Veillonellaceae	0	0	0	0	0.000371609	0	0	0	0	0	0	0	0	0	0	0	0	0	0.000371609	0
k__Bacteria;p__Firmicutes;c__Clostridia;o__Clostridiales;f__[Mogibacteriaceae]	0	0	0.000743218	0	0.000371609	0	0.000371609	0	0	0	0	0	0	0	0	0	0	0	0.000371609	0
k__Bacteria;p__Firmicutes;c__Erysipelotrichi;o__Erysipelotrichales;f__Erysipelotrichaceae	0.00668896	0.00111483	0.000371609	0.000371609	0.00148644	0.000371609	0.00260126	0.00148644	0.00111483	0.00668896	0.00222965	0	0.000371609	0.0040877	0.00148644	0.00111483	0.000371609	0.000743218	0.000371609	0.00148644
k__Bacteria;p__Fusobacteria;c__Fusobacteriia;o__Fusobacteriales;f__Fusobacteriaceae	0	0	0	0	0	0	0	0	0	0	0.000371609	0	0	0	0	0	0	0	0	0
k__Bacteria;p__Proteobacteria;c__Alphaproteobacteria;o__RF32;f__	0.00371609	0.00148644	0.00297287	0.000371609	0.00260126	0	0.00185805	0.0178372	0	0	0.00148644	0.00222965	0.00148644	0.00334448	0.000371609	0	0	0	0	0
k__Bacteria;p__Proteobacteria;c__Betaproteobacteria;o__Burkholderiales;f__Alcaligenaceae	0.0241546	0	0.00334448	0.00148644	0.000743218	0.000743218	0.000371609	0.000743218	0.00111483	0.00148644	0.0148644	0.000743218	0	0.000371609	0.0107767	0.00334448	0.000743218	0.000743218	0	0.00111483
k__Bacteria;p__Proteobacteria;c__Deltaproteobacteria;o__Desulfovibrionales;f__Desulfovibrionaceae	0	0.000743218	0	0	0	0	0	0.000371609	0.000371609	0.000371609	0.00111483	0.000743218	0.00743218	0.000743218	0	0.000371609	0.000743218	0.00185805	0.000371609	0
k__Bacteria;p__Proteobacteria;c__Gammaproteobacteria;o__Enterobacteriales;f__Enterobacteriaceae	0.000371609	0	0	0	0.000371609	0	0.00111483	0	0	0	0.000371609	0.000371609	0.000371609	0.000371609	0.000371609	0	0.000743218	0	0.000371609	0
k__Bacteria;p__Spirochaetes;c__Spirochaetes;o__Spirochaetales;f__Spirochaetaceae	0	0	0	0	0	0	0	0	0	0	0	0.000371609	0	0.000371609	0.000371609	0	0	0	0	0
k__Bacteria;p__Tenericutes;c__Mollicutes;o__RF39;f__	0.00222965	0.00297287	0.00148644	0.00297287	0.000371609	0	0	0.00297287	0.00334448	0	0.000743218	0.00111483	0	0.000743218	0	0.00111483	0.00854701	0.00260126	0.00445931	0.00111483
k__Bacteria;p__Verrucomicrobia;c__Verrucomicrobiae;o__Verrucomicrobiales;f__Verrucomicrobiaceae	0.00185805	0	0	0	0	0	0	0	0	0	0.000371609	0	0	0	0	0.000743218	0	0	0	0

## Sheet: genus
#OTU ID	HG1	HG2	HG3	HG4	HG5	LETO1	LETO2	LETO3	LETO4	LETO5	Met1	Met2	Met3	Met4	Met5	OLETF1	OLETF2	OLETF3	OLETF4	OLETF5
Unassigned;Other;Other;Other;Other;Other	0.0230398	0.00111483	0.00706057	0.00334448	0.00483092	0.00445931	0.0111483	0.0107767	0.00706057	0.00557414	0.00483092	0.0278707	0.0126347	0.00743218	0.00483092	0.00520253	0.0107767	0.0156076	0.00520253	0.00445931
k__Bacteria;Other;Other;Other;Other;Other	0	0	0	0	0.000371609	0	0	0	0	0	0	0	0	0	0.000371609	0	0	0	0	0
k__Bacteria;p__Actinobacteria;c__Actinobacteria;o__Actinomycetales;f__Corynebacteriaceae;g__Corynebacterium	0	0	0	0	0	0	0	0	0	0	0	0	0	0	0	0	0	0	0	0.000371609
k__Bacteria;p__Actinobacteria;c__Coriobacteriia;o__Coriobacteriales;f__Coriobacteriaceae;g__Adlercreutzia	0.000371609	0	0	0	0	0	0	0.000743218	0.000371609	0.00111483	0	0	0	0	0	0	0	0	0	0
k__Bacteria;p__Bacteroidetes;c__Bacteroidia;o__Bacteroidales;Other;Other	0	0	0	0.000371609	0	0	0	0	0	0.000371609	0	0	0	0	0	0.000371609	0	0.000743218	0	0
k__Bacteria;p__Bacteroidetes;c__Bacteroidia;o__Bacteroidales;f__;g__	0.0100334	0.00222965	0.00371609	0.00111483	0.000743218	0.000371609	0.000371609	0.00111483	0	0.000371609	0.00111483	0	0.000371609	0.000743218	0.000371609	0.00148644	0	0.00334448	0.00222965	0.000371609
k__Bacteria;p__Bacteroidetes;c__Bacteroidia;o__Bacteroidales;f__Bacteroidaceae;g__Bacteroides	0.332219	0.0746934	0.0490524	0.0208101	0.200297	0.205128	0.331475	0.250465	0.187663	0.301375	0.157562	0.0274991	0.0572278	0.0672612	0.183203	0.2932	0.111483	0.328131	0.0906726	0.0795243
k__Bacteria;p__Bacteroidetes;c__Bacteroidia;o__Bacteroidales;f__Porphyromonadaceae;g__Parabacteroides	0.0445931	0.00185805	0.00260126	0.000371609	0.000371609	0.000743218	0.00445931	0.00557414	0.00185805	0.00260126	0.00185805	0.00185805	0.00260126	0.00520253	0.00222965	0.00297287	0.00111483	0.00371609	0	0.000371609
k__Bacteria;p__Bacteroidetes;c__Bacteroidia;o__Bacteroidales;f__Porphyromonadaceae;g__Porphyromonas	0	0	0	0	0	0.000371609	0	0	0	0	0	0	0.000371609	0	0	0	0	0	0	0
k__Bacteria;p__Bacteroidetes;c__Bacteroidia;o__Bacteroidales;f__Prevotellaceae;Other	0	0	0	0	0	0	0.000371609	0	0	0	0	0	0	0	0	0	0	0	0	0
k__Bacteria;p__Bacteroidetes;c__Bacteroidia;o__Bacteroidales;f__Prevotellaceae;g__	0.000371609	0.0133779	0.00668896	0.00854701	0.00185805	0.000371609	0.00929023	0.0189521	0.00334448	0.00445931	0.00371609	0.0196953	0.00445931	0.0159792	0.00371609	0.0620587	0.00557414	0.0412486	0.0133779	0.00445931
k__Bacteria;p__Bacteroidetes;c__Bacteroidia;o__Bacteroidales;f__Prevotellaceae;g__Prevotella	0.0200669	0.0464511	0.0442215	0.039019	0.0802676	0.000371609	0.0081754	0.0523969	0.00631735	0.00743218	0.0211817	0.0453363	0.0327016	0.0654032	0.0148644	0.0509104	0.0263842	0.0137495	0.0330732	0.017094
k__Bacteria;p__Bacteroidetes;c__Bacteroidia;o__Bacteroidales;f__Rikenellaceae;g__	0.00334448	0.0081754	0.00148644	0.00594575	0.00966184	0.0081754	0.00148644	0.0156076	0.00185805	0.00222965	0.00185805	0.00185805	0.0174656	0.0141211	0.00743218	0.00483092	0.00557414	0.017094	0.0107767	0.00706057
k__Bacteria;p__Bacteroidetes;c__Bacteroidia;o__Bacteroidales;f__S24-7;g__	0.379041	0.49424	0.629506	0.720922	0.433296	0.422148	0.183203	0.258268	0.519509	0.328874	0.586027	0.533259	0.642512	0.538462	0.499071	0.299889	0.677072	0.27016	0.411371	0.659978
k__Bacteria;p__Bacteroidetes;c__Bacteroidia;o__Bacteroidales;f__[Odoribacteraceae];g__Odoribacter	0.00520253	0.000371609	0.00185805	0.00111483	0.00111483	0.000371609	0	0.00148644	0	0	0	0.00222965	0.00185805	0.00148644	0.00111483	0.00185805	0.00222965	0.0040877	0.00111483	0.00148644
k__Bacteria;p__Bacteroidetes;c__Bacteroidia;o__Bacteroidales;f__[Paraprevotellaceae];g__CF231	0.000371609	0	0	0	0	0	0	0	0	0	0	0	0	0	0	0	0	0	0	0.000371609
k__Bacteria;p__Bacteroidetes;c__Bacteroidia;o__Bacteroidales;f__p-2534-18B5;g__	0	0	0	0	0	0	0	0	0	0	0	0	0	0.000371609	0	0	0	0	0	0
k__Bacteria;p__Deferribacteres;c__Deferribacteres;o__Deferribacterales;f__Deferribacteraceae;g__Mucispirillum	0	0	0	0	0	0.0040877	0.00222965	0.000371609	0	0	0	0	0	0	0.000743218	0.000371609	0	0.00185805	0.000371609	0.0081754
k__Bacteria;p__Firmicutes;c__Bacilli;o__Bacillales;f__Bacillaceae;g__	0	0	0.00334448	0	0.000743218	0	0.00148644	0.0040877	0	0	0	0	0	0.00111483	0	0.000371609	0	0.000371609	0	0
k__Bacteria;p__Firmicutes;c__Bacilli;o__Bacillales;f__Planococcaceae;Other	0	0	0	0	0	0	0	0	0	0	0	0	0	0	0	0	0.000371609	0	0	0
k__Bacteria;p__Firmicutes;c__Bacilli;o__Bacillales;f__Planococcaceae;g__	0	0	0	0	0	0	0	0	0	0	0	0	0	0.000743218	0.000371609	0	0	0	0.000371609	0.000371609
k__Bacteria;p__Firmicutes;c__Bacilli;o__Bacillales;f__Planococcaceae;g__Lysinibacillus	0	0	0	0	0	0	0	0	0	0	0	0.000743218	0	0	0	0	0	0	0	0
k__Bacteria;p__Firmicutes;c__Bacilli;o__Bacillales;f__Planococcaceae;g__Rummeliibacillus	0	0	0	0	0	0	0	0	0	0	0	0	0	0.000371609	0	0.000371609	0	0	0	0
k__Bacteria;p__Firmicutes;c__Bacilli;o__Lactobacillales;f__Lactobacillaceae;g__Lactobacillus	0.00520253	0.0159792	0.00445931	0.00185805	0.00483092	0.00297287	0.00631735	0.00334448	0.00371609	0.00891862	0.00185805	0.00111483	0.00148644	0.00594575	0.00297287	0.00668896	0.00594575	0.00260126	0.00520253	0.00334448
k__Bacteria;p__Firmicutes;c__Bacilli;o__Lactobacillales;f__Streptococcaceae;g__Lactococcus	0.000371609	0	0	0	0	0	0	0	0	0	0	0	0	0	0	0	0	0	0	0
k__Bacteria;p__Firmicutes;c__Bacilli;o__Lactobacillales;f__Streptococcaceae;g__Streptococcus	0	0	0	0	0	0	0.000743218	0	0	0.000371609	0	0.000371609	0	0	0	0	0	0	0	0.000371609
k__Bacteria;p__Firmicutes;c__Bacilli;o__Turicibacterales;f__Turicibacteraceae;g__Turicibacter	0.00111483	0.00297287	0.00557414	0.0040877	0.0104051	0	0.000371609	0	0	0.000371609	0.00185805	0.000371609	0.00111483	0.0445931	0	0.000371609	0	0	0.000743218	0.000371609
k__Bacteria;p__Firmicutes;c__Clostridia;o__Clostridiales;Other;Other	0.00371609	0.114827	0.0252694	0.0917874	0.000743218	0.00334448	0.00706057	0.00966184	0.00706057	0.00185805	0.00334448	0.132664	0.0230398	0.0460795	0.00222965	0.0104051	0.00111483	0.03233	0.0040877	0.00148644
k__Bacteria;p__Firmicutes;c__Clostridia;o__Clostridiales;f__;g__	0.0431067	0.0981048	0.0869565	0.0364177	0.0587142	0.171312	0.0743218	0.190635	0.0434783	0.0572278	0.0654032	0.0992196	0.0505388	0.0405054	0.0509104	0.092159	0.0672612	0.128577	0.150502	0.0865849
k__Bacteria;p__Firmicutes;c__Clostridia;o__Clostridiales;f__Christensenellaceae;g__	0.00743218	0.00148644	0.000743218	0.000371609	0.00148644	0.00891862	0.0104051	0.00929023	0.00148644	0.00483092	0.00111483	0.00222965	0.00260126	0.00148644	0.00483092	0.00743218	0.000743218	0.00260126	0.00371609	0.000743218
k__Bacteria;p__Firmicutes;c__Clostridia;o__Clostridiales;f__Clostridiaceae;Other	0	0	0	0	0	0	0	0	0	0	0	0	0	0	0	0	0	0.000371609	0.000371609	0
k__Bacteria;p__Firmicutes;c__Clostridia;o__Clostridiales;f__Clostridiaceae;g__	0.0100334	0.0520253	0.0765515	0.0189521	0.0564846	0.00706057	0.00445931	0.00185805	0.000371609	0.00297287	0.0594575	0.00445931	0.00780379	0.0813824	0.0706057	0.00854701	0.00668896	0.00668896	0.0464511	0.00371609
k__Bacteria;p__Firmicutes;c__Clostridia;o__Clostridiales;f__Clostridiaceae;g__Clostridium	0.000371609	0	0	0	0.000371609	0.00185805	0.000743218	0.00111483	0	0.000371609	0.00111483	0	0	0	0	0.00185805	0.00334448	0.000371609	0.00148644	0
k__Bacteria;p__Firmicutes;c__Clostridia;o__Clostridiales;f__Dehalobacteriaceae;g__Dehalobacterium	0	0	0	0.000743218	0.000371609	0	0	0.000371609	0	0	0.000371609	0	0	0.00148644	0.000371609	0	0	0.000371609	0	0
k__Bacteria;p__Firmicutes;c__Clostridia;o__Clostridiales;f__Lachnospiraceae;Other	0.000743218	0.00222965	0.000371609	0.000371609	0.000743218	0.00297287	0.00445931	0.00445931	0.00111483	0.00594575	0.00260126	0.000371609	0	0.000743218	0.00334448	0.00148644	0	0.0148644	0.00111483	0.000371609
k__Bacteria;p__Firmicutes;c__Clostridia;o__Clostridiales;f__Lachnospiraceae;g__	0.00260126	0.00594575	0.00371609	0.00445931	0.0126347	0.0278707	0.0360461	0.0226682	0.0308436	0.10628	0.0144928	0.0156076	0.00929023	0.0100334	0.00966184	0.0040877	0.00185805	0.0111483	0.00929023	0.00445931
k__Bacteria;p__Firmicutes;c__Clostridia;o__Clostridiales;f__Lachnospiraceae;g__Blautia	0.00222965	0.000743218	0	0	0.000743218	0.000743218	0.0587142	0.00743218	0.0241546	0.0850985	0.00185805	0	0	0	0.00260126	0.00148644	0.000371609	0.00148644	0.000743218	0
k__Bacteria;p__Firmicutes;c__Clostridia;o__Clostridiales;f__Lachnospiraceae;g__Coprococcus	0	0.00483092	0.00111483	0.00743218	0.0245262	0.0174656	0.00148644	0.00148644	0.0111483	0.0159792	0.00111483	0.00483092	0.0130063	0.00111483	0.00185805	0.000371609	0.0163508	0.00222965	0.0598291	0
k__Bacteria;p__Firmicutes;c__Clostridia;o__Clostridiales;f__Lachnospiraceae;g__Dorea	0.00111483	0	0.000743218	0	0.00557414	0.000743218	0.000371609	0.00260126	0	0.00891862	0.00148644	0.000371609	0	0	0.00185805	0.000371609	0	0.000371609	0.000743218	0.000371609
k__Bacteria;p__Firmicutes;c__Clostridia;o__Clostridiales;f__Lachnospiraceae;g__Lachnospira	0	0.000371609	0	0	0	0.000371609	0	0	0.00111483	0	0	0	0	0	0	0	0	0	0	0
k__Bacteria;p__Firmicutes;c__Clostridia;o__Clostridiales;f__Lachnospiraceae;g__Roseburia	0	0	0	0.000371609	0	0.000371609	0.000743218	0	0.00854701	0.00185805	0.00111483	0	0	0	0	0	0	0.000371609	0	0
k__Bacteria;p__Firmicutes;c__Clostridia;o__Clostridiales;f__Lachnospiraceae;g__[Ruminococcus]	0	0.00111483	0.00111483	0.000371609	0.00185805	0.00334448	0.00445931	0.00929023	0.00185805	0	0.00260126	0.00148644	0.00185805	0.000743218	0	0.000743218	0.00297287	0.00260126	0.00371609	0
k__Bacteria;p__Firmicutes;c__Clostridia;o__Clostridiales;f__Peptococcaceae;g__rc4-4	0	0	0.00148644	0	0.00111483	0.00185805	0.0040877	0.00185805	0.00111483	0.00111483	0	0.000743218	0	0.000743218	0	0	0	0.000371609	0	0
k__Bacteria;p__Firmicutes;c__Clostridia;o__Clostridiales;f__Peptostreptococcaceae;g__	0	0.000371609	0	0	0	0	0	0	0	0	0.000371609	0	0	0.000371609	0.000743218	0	0	0	0	0
k__Bacteria;p__Firmicutes;c__Clostridia;o__Clostridiales;f__Ruminococcaceae;Other	0	0	0.00111483	0	0.00445931	0.00891862	0.0107767	0.0211817	0.00111483	0	0.00371609	0.00185805	0.00222965	0.000371609	0	0.0260126	0.00260126	0.0137495	0.0683761	0.00483092
k__Bacteria;p__Firmicutes;c__Clostridia;o__Clostridiales;f__Ruminococcaceae;g__	0.0471944	0.0115199	0.0104051	0.00929023	0.0356745	0.0401338	0.185061	0.0319584	0.108138	0.0215533	0.0122631	0.0211817	0.0330732	0.0156076	0.105537	0.0252694	0.015236	0.0319584	0.0208101	0.0274991
k__Bacteria;p__Firmicutes;c__Clostridia;o__Clostridiales;f__Ruminococcaceae;g__Oscillospira	0.0104051	0.023783	0.0130063	0.0137495	0.0289855	0.0367893	0.0111483	0.0219249	0.0100334	0.00706057	0.0196953	0.0367893	0.0594575	0.0159792	0.00929023	0.0286139	0.0222965	0.0241546	0.0353029	0.0460795
k__Bacteria;p__Firmicutes;c__Clostridia;o__Clostridiales;f__Ruminococcaceae;g__Ruminococcus	0.00668896	0.0148644	0.00891862	0.00297287	0.0104051	0.015236	0.0182088	0.0156076	0.0107767	0.00631735	0.00445931	0.0104051	0.0126347	0.0040877	0.00148644	0.0535117	0.00148644	0.0167224	0.0126347	0.0319584
k__Bacteria;p__Firmicutes;c__Clostridia;o__Clostridiales;f__Veillonellaceae;g__Anaerovibrio	0	0	0	0	0.000371609	0	0	0	0	0	0	0	0	0	0	0	0	0	0	0
k__Bacteria;p__Firmicutes;c__Clostridia;o__Clostridiales;f__Veillonellaceae;g__Phascolarctobacterium	0	0	0	0	0	0	0	0	0	0	0	0	0	0	0	0	0	0	0.000371609	0
k__Bacteria;p__Firmicutes;c__Clostridia;o__Clostridiales;f__[Mogibacteriaceae];g__	0	0	0.000743218	0	0.000371609	0	0.000371609	0	0	0	0	0	0	0	0	0	0	0	0.000371609	0
k__Bacteria;p__Firmicutes;c__Erysipelotrichi;o__Erysipelotrichales;f__Erysipelotrichaceae;g__	0.00483092	0	0	0	0	0	0.000371609	0	0	0	0	0	0	0.000371609	0	0	0	0.000371609	0	0.000371609
k__Bacteria;p__Firmicutes;c__Erysipelotrichi;o__Erysipelotrichales;f__Erysipelotrichaceae;g__Allobaculum	0.00111483	0.00111483	0.000371609	0.000371609	0.00148644	0.000371609	0.00222965	0.00148644	0.000743218	0.00297287	0.00222965	0	0.000371609	0.00334448	0.000743218	0.000743218	0.000371609	0.000371609	0.000371609	0.00111483
k__Bacteria;p__Firmicutes;c__Erysipelotrichi;o__Erysipelotrichales;f__Erysipelotrichaceae;g__Holdemania	0.000371609	0	0	0	0	0	0	0	0.000371609	0.00297287	0	0	0	0.000371609	0.000371609	0.000371609	0	0	0	0
k__Bacteria;p__Firmicutes;c__Erysipelotrichi;o__Erysipelotrichales;f__Erysipelotrichaceae;g__[Eubacterium]	0.000371609	0	0	0	0	0	0	0	0	0.000743218	0	0	0	0	0.000371609	0	0	0	0	0
k__Bacteria;p__Fusobacteria;c__Fusobacteriia;o__Fusobacteriales;f__Fusobacteriaceae;g__Fusobacterium	0	0	0	0	0	0	0	0	0	0	0.000371609	0	0	0	0	0	0	0	0	0
k__Bacteria;p__Proteobacteria;c__Alphaproteobacteria;o__RF32;f__;g__	0.00371609	0.00148644	0.00297287	0.000371609	0.00260126	0	0.00185805	0.0178372	0	0	0.00148644	0.00222965	0.00148644	0.00334448	0.000371609	0	0	0	0	0
k__Bacteria;p__Proteobacteria;c__Betaproteobacteria;o__Burkholderiales;f__Alcaligenaceae;g__Sutterella	0.0241546	0	0.00334448	0.00148644	0.000743218	0.000743218	0.000371609	0.000743218	0.00111483	0.00148644	0.0148644	0.000743218	0	0.000371609	0.0107767	0.00334448	0.000743218	0.000743218	0	0.00111483
k__Bacteria;p__Proteobacteria;c__Deltaproteobacteria;o__Desulfovibrionales;f__Desulfovibrionaceae;g__	0	0.000371609	0	0	0	0	0	0.000371609	0	0.000371609	0.00111483	0.000743218	0.00743218	0.000743218	0	0.000371609	0.000743218	0.00185805	0.000371609	0
k__Bacteria;p__Proteobacteria;c__Deltaproteobacteria;o__Desulfovibrionales;f__Desulfovibrionaceae;g__Desulfovibrio	0	0.000371609	0	0	0	0	0	0	0.000371609	0	0	0	0	0	0	0	0	0	0	0
k__Bacteria;p__Proteobacteria;c__Gammaproteobacteria;o__Enterobacteriales;f__Enterobacteriaceae;g__	0.000371609	0	0	0	0.000371609	0	0.00111483	0	0	0	0.000371609	0.000371609	0.000371609	0.000371609	0.000371609	0	0.000743218	0	0.000371609	0
k__Bacteria;p__Spirochaetes;c__Spirochaetes;o__Spirochaetales;f__Spirochaetaceae;g__Treponema	0	0	0	0	0	0	0	0	0	0	0	0.000371609	0	0.000371609	0.000371609	0	0	0	0	0
k__Bacteria;p__Tenericutes;c__Mollicutes;o__RF39;f__;g__	0.00222965	0.00297287	0.00148644	0.00297287	0.000371609	0	0	0.00297287	0.00334448	0	0.000743218	0.00111483	0	0.000743218	0	0.00111483	0.00854701	0.00260126	0.00445931	0.00111483
k__Bacteria;p__Verrucomicrobia;c__Verrucomicrobiae;o__Verrucomicrobiales;f__Verrucomicrobiaceae;g__Akkermansia	0.00185805	0	0	0	0	0	0	0	0	0	0.000371609	0	0	0	0	0.000743218	0	0	0	0

## Sheet: genus table
#OTU ID	LETO	OLETF	MET	HG									genus
Unassigned;Other;Other;Other;Other;Other	0.00780379	0.00824972	0.0115199	0.00787811			#OTU ID	Unassigned	Other	Other	Other	Other		LETO	OLETF	MET	HG
k__Bacteria;Other;Other;Other;Other;Other	0	0	7.43218e-05	7.43218e-05			Unassigned;Other;Other;Other;Other;Other	k__Bacteria	Other	Other	Other	Other	Other	0.780379	0.824972	1.15199	0.787811
k__Bacteria;p__Actinobacteria;c__Actinobacteria;o__Actinomycetales;f__Corynebacteriaceae;g__Corynebacterium	0	7.43218e-05	0	0			k__Bacteria;Other;Other;Other;Other;Other	k__Bacteria	p__Actinobacteria	c__Actinobacteria	o__Actinomycetales	f__Corynebacteriaceae	g__Corynebacterium	0	0	0.00743218	0.00743218
k__Bacteria;p__Actinobacteria;c__Coriobacteriia;o__Coriobacteriales;f__Coriobacteriaceae;g__Adlercreutzia	0.000445931	0	0	7.43218e-05			k__Bacteria;p__Actinobacteria;c__Actinobacteria;o__Actinomycetales;f__Corynebacteriaceae;g__Corynebacterium	k__Bacteria	p__Actinobacteria	c__Coriobacteriia	o__Coriobacteriales	f__Coriobacteriaceae	g__Adlercreutzia	0	0.00743218	0	0
k__Bacteria;p__Bacteroidetes;c__Bacteroidia;o__Bacteroidales;Other;Other	7.43218e-05	0.000222965	0	7.43218e-05			k__Bacteria;p__Actinobacteria;c__Coriobacteriia;o__Coriobacteriales;f__Coriobacteriaceae;g__Adlercreutzia	k__Bacteria	p__Bacteroidetes	c__Bacteroidia	o__Bacteroidales	Other	Other	0.0445931	0	0	0.00743218
k__Bacteria;p__Bacteroidetes;c__Bacteroidia;o__Bacteroidales;f__;g__	0.000445931	0.00148644	0.000520253	0.00356745			k__Bacteria;p__Bacteroidetes;c__Bacteroidia;o__Bacteroidales;Other;Other	k__Bacteria	p__Bacteroidetes	c__Bacteroidia	o__Bacteroidales	f__	g__	0.00743218	0.0222965	0	0.00743218
k__Bacteria;p__Bacteroidetes;c__Bacteroidia;o__Bacteroidales;f__Bacteroidaceae;g__Bacteroides	0.255221	0.180602	0.0985507	0.135414			k__Bacteria;p__Bacteroidetes;c__Bacteroidia;o__Bacteroidales;f__;g__	k__Bacteria	p__Bacteroidetes	c__Bacteroidia	o__Bacteroidales	f__Bacteroidaceae	g__Bacteroides	0.0445931	0.148644	0.0520253	0.356745
k__Bacteria;p__Bacteroidetes;c__Bacteroidia;o__Bacteroidales;f__Porphyromonadaceae;g__Parabacteroides	0.00304719	0.00163508	0.00274991	0.00995912			k__Bacteria;p__Bacteroidetes;c__Bacteroidia;o__Bacteroidales;f__Bacteroidaceae;g__Bacteroides	k__Bacteria	p__Bacteroidetes	c__Bacteroidia	o__Bacteroidales	f__Porphyromonadaceae	g__Parabacteroides	25.5221	18.0602	9.85507	13.5414
k__Bacteria;p__Bacteroidetes;c__Bacteroidia;o__Bacteroidales;f__Porphyromonadaceae;g__Porphyromonas	7.43218e-05	0	7.43218e-05	0			k__Bacteria;p__Bacteroidetes;c__Bacteroidia;o__Bacteroidales;f__Porphyromonadaceae;g__Parabacteroides	k__Bacteria	p__Bacteroidetes	c__Bacteroidia	o__Bacteroidales	f__Porphyromonadaceae	g__Porphyromonas	0.304719	0.163508	0.274991	0.995912
k__Bacteria;p__Bacteroidetes;c__Bacteroidia;o__Bacteroidales;f__Prevotellaceae;Other	7.43218e-05	0	0	0			k__Bacteria;p__Bacteroidetes;c__Bacteroidia;o__Bacteroidales;f__Porphyromonadaceae;g__Porphyromonas	k__Bacteria	p__Bacteroidetes	c__Bacteroidia	o__Bacteroidales	f__Prevotellaceae	Other	0.00743218	0	0.00743218	0
k__Bacteria;p__Bacteroidetes;c__Bacteroidia;o__Bacteroidales;f__Prevotellaceae;g__	0.00728354	0.0253437	0.00951319	0.00616871			k__Bacteria;p__Bacteroidetes;c__Bacteroidia;o__Bacteroidales;f__Prevotellaceae;Other	k__Bacteria	p__Bacteroidetes	c__Bacteroidia	o__Bacteroidales	f__Prevotellaceae	g__	0.00743218	0	0	0
k__Bacteria;p__Bacteroidetes;c__Bacteroidia;o__Bacteroidales;f__Prevotellaceae;g__Prevotella	0.0149387	0.0282423	0.0358974	0.0460052			k__Bacteria;p__Bacteroidetes;c__Bacteroidia;o__Bacteroidales;f__Prevotellaceae;g__	k__Bacteria	p__Bacteroidetes	c__Bacteroidia	o__Bacteroidales	f__Prevotellaceae	g__Prevotella	0.728354	2.53437	0.951319	0.616871
k__Bacteria;p__Bacteroidetes;c__Bacteroidia;o__Bacteroidales;f__Rikenellaceae;g__	0.00587142	0.00906726	0.00854701	0.00572278			k__Bacteria;p__Bacteroidetes;c__Bacteroidia;o__Bacteroidales;f__Prevotellaceae;g__Prevotella	k__Bacteria	p__Bacteroidetes	c__Bacteroidia	o__Bacteroidales	f__Rikenellaceae	g__	1.49387	2.82423	3.58974	4.60052
k__Bacteria;p__Bacteroidetes;c__Bacteroidia;o__Bacteroidales;f__S24-7;g__	0.342401	0.463694	0.559866	0.531401			k__Bacteria;p__Bacteroidetes;c__Bacteroidia;o__Bacteroidales;f__Rikenellaceae;g__	k__Bacteria	p__Bacteroidetes	c__Bacteroidia	o__Bacteroidales	f__S24-7	g__	0.587142	0.906726	0.854701	0.572278
k__Bacteria;p__Bacteroidetes;c__Bacteroidia;o__Bacteroidales;f__[Odoribacteraceae];g__Odoribacter	0.000371609	0.00215533	0.00133779	0.00193237			k__Bacteria;p__Bacteroidetes;c__Bacteroidia;o__Bacteroidales;f__S24-7;g__	k__Bacteria	p__Bacteroidetes	c__Bacteroidia	o__Bacteroidales	f__[Odoribacteraceae]	g__Odoribacter	34.2401	46.3694	55.9866	53.1401
k__Bacteria;p__Bacteroidetes;c__Bacteroidia;o__Bacteroidales;f__[Paraprevotellaceae];g__CF231	0	7.43218e-05	0	7.43218e-05			k__Bacteria;p__Bacteroidetes;c__Bacteroidia;o__Bacteroidales;f__[Odoribacteraceae];g__Odoribacter	k__Bacteria	p__Bacteroidetes	c__Bacteroidia	o__Bacteroidales	f__[Paraprevotellaceae]	g__CF231	0.0371609	0.215533	0.133779	0.193237
k__Bacteria;p__Bacteroidetes;c__Bacteroidia;o__Bacteroidales;f__p-2534-18B5;g__	0	0	7.43218e-05	0			k__Bacteria;p__Bacteroidetes;c__Bacteroidia;o__Bacteroidales;f__[Paraprevotellaceae];g__CF231	k__Bacteria	p__Bacteroidetes	c__Bacteroidia	o__Bacteroidales	f__p-2534-18B5	g__	0	0.00743218	0	0.00743218
k__Bacteria;p__Deferribacteres;c__Deferribacteres;o__Deferribacterales;f__Deferribacteraceae;g__Mucispirillum	0.00133779	0.00215533	0.000148644	0			k__Bacteria;p__Bacteroidetes;c__Bacteroidia;o__Bacteroidales;f__p-2534-18B5;g__	k__Bacteria	p__Deferribacteres	c__Deferribacteres	o__Deferribacterales	f__Deferribacteraceae	g__Mucispirillum	0	0	0.00743218	0
k__Bacteria;p__Firmicutes;c__Bacilli;o__Bacillales;f__Bacillaceae;g__	0.00111483	0.000148644	0.000222965	0.00081754			k__Bacteria;p__Deferribacteres;c__Deferribacteres;o__Deferribacterales;f__Deferribacteraceae;g__Mucispirillum	k__Bacteria	p__Firmicutes	c__Bacilli	o__Bacillales	f__Bacillaceae	g__	0.133779	0.215533	0.0148644	0
k__Bacteria;p__Firmicutes;c__Bacilli;o__Bacillales;f__Planococcaceae;Other	0	7.43218e-05	0	0			k__Bacteria;p__Firmicutes;c__Bacilli;o__Bacillales;f__Bacillaceae;g__	k__Bacteria	p__Firmicutes	c__Bacilli	o__Bacillales	f__Planococcaceae	Other	0.111483	0.0148644	0.0222965	0.081754
k__Bacteria;p__Firmicutes;c__Bacilli;o__Bacillales;f__Planococcaceae;g__	0	0.000148644	0.000222965	0			k__Bacteria;p__Firmicutes;c__Bacilli;o__Bacillales;f__Planococcaceae;Other	k__Bacteria	p__Firmicutes	c__Bacilli	o__Bacillales	f__Planococcaceae	g__	0	0.00743218	0	0
k__Bacteria;p__Firmicutes;c__Bacilli;o__Bacillales;f__Planococcaceae;g__Lysinibacillus	0	0	0.000148644	0			k__Bacteria;p__Firmicutes;c__Bacilli;o__Bacillales;f__Planococcaceae;g__	k__Bacteria	p__Firmicutes	c__Bacilli	o__Bacillales	f__Planococcaceae	g__Lysinibacillus	0	0.0148644	0.0222965	0
k__Bacteria;p__Firmicutes;c__Bacilli;o__Bacillales;f__Planococcaceae;g__Rummeliibacillus	0	7.43218e-05	7.43218e-05	0			k__Bacteria;p__Firmicutes;c__Bacilli;o__Bacillales;f__Planococcaceae;g__Lysinibacillus	k__Bacteria	p__Firmicutes	c__Bacilli	o__Bacillales	f__Planococcaceae	g__Rummeliibacillus	0	0	0.0148644	0
k__Bacteria;p__Firmicutes;c__Bacilli;o__Lactobacillales;f__Lactobacillaceae;g__Lactobacillus	0.00505388	0.0047566	0.00267559	0.006466			k__Bacteria;p__Firmicutes;c__Bacilli;o__Bacillales;f__Planococcaceae;g__Rummeliibacillus	k__Bacteria	p__Firmicutes	c__Bacilli	o__Lactobacillales	f__Lactobacillaceae	g__Lactobacillus	0	0.00743218	0.00743218	0
k__Bacteria;p__Firmicutes;c__Bacilli;o__Lactobacillales;f__Streptococcaceae;g__Lactococcus	0	0	0	7.43218e-05			k__Bacteria;p__Firmicutes;c__Bacilli;o__Lactobacillales;f__Lactobacillaceae;g__Lactobacillus	k__Bacteria	p__Firmicutes	c__Bacilli	o__Lactobacillales	f__Streptococcaceae	g__Lactococcus	0.505388	0.47566	0.267559	0.6466
k__Bacteria;p__Firmicutes;c__Bacilli;o__Lactobacillales;f__Streptococcaceae;g__Streptococcus	0.000222965	7.43218e-05	7.43218e-05	0			k__Bacteria;p__Firmicutes;c__Bacilli;o__Lactobacillales;f__Streptococcaceae;g__Lactococcus	k__Bacteria	p__Firmicutes	c__Bacilli	o__Lactobacillales	f__Streptococcaceae	g__Streptococcus	0	0	0	0.00743218
k__Bacteria;p__Firmicutes;c__Bacilli;o__Turicibacterales;f__Turicibacteraceae;g__Turicibacter	0.000148644	0.000297287	0.00958751	0.00483092			k__Bacteria;p__Firmicutes;c__Bacilli;o__Lactobacillales;f__Streptococcaceae;g__Streptococcus	k__Bacteria	p__Firmicutes	c__Bacilli	o__Turicibacterales	f__Turicibacteraceae	g__Turicibacter	0.0222965	0.00743218	0.00743218	0
k__Bacteria;p__Firmicutes;c__Clostridia;o__Clostridiales;Other;Other	0.0057971	0.0098848	0.0414716	0.0472687			k__Bacteria;p__Firmicutes;c__Bacilli;o__Turicibacterales;f__Turicibacteraceae;g__Turicibacter	k__Bacteria	p__Firmicutes	c__Clostridia	o__Clostridiales	Other	Other	0.0148644	0.0297287	0.958751	0.483092
k__Bacteria;p__Firmicutes;c__Clostridia;o__Clostridiales;f__;g__	0.107395	0.105017	0.0613155	0.06466			k__Bacteria;p__Firmicutes;c__Clostridia;o__Clostridiales;Other;Other	k__Bacteria	p__Firmicutes	c__Clostridia	o__Clostridiales	f__	g__	0.57971	0.98848	4.14716	4.72687
k__Bacteria;p__Firmicutes;c__Clostridia;o__Clostridiales;f__Christensenellaceae;g__	0.00698625	0.00304719	0.00245262	0.00230398			k__Bacteria;p__Firmicutes;c__Clostridia;o__Clostridiales;f__;g__	k__Bacteria	p__Firmicutes	c__Clostridia	o__Clostridiales	f__Christensenellaceae	g__	10.7395	10.5017	6.13155	6.466
k__Bacteria;p__Firmicutes;c__Clostridia;o__Clostridiales;f__Clostridiaceae;Other	0	0.000148644	0	0			k__Bacteria;p__Firmicutes;c__Clostridia;o__Clostridiales;f__Christensenellaceae;g__	k__Bacteria	p__Firmicutes	c__Clostridia	o__Clostridiales	f__Clostridiaceae	Other	0.698625	0.304719	0.245262	0.230398
k__Bacteria;p__Firmicutes;c__Clostridia;o__Clostridiales;f__Clostridiaceae;g__	0.00334448	0.0144184	0.0447417	0.0428094			k__Bacteria;p__Firmicutes;c__Clostridia;o__Clostridiales;f__Clostridiaceae;Other	k__Bacteria	p__Firmicutes	c__Clostridia	o__Clostridiales	f__Clostridiaceae	g__	0	0.0148644	0	0
k__Bacteria;p__Firmicutes;c__Clostridia;o__Clostridiales;f__Clostridiaceae;g__Clostridium	0.00081754	0.00141211	0.000222965	0.000148644			k__Bacteria;p__Firmicutes;c__Clostridia;o__Clostridiales;f__Clostridiaceae;g__	k__Bacteria	p__Firmicutes	c__Clostridia	o__Clostridiales	f__Clostridiaceae	g__Clostridium	0.334448	1.44184	4.47417	4.28094
k__Bacteria;p__Firmicutes;c__Clostridia;o__Clostridiales;f__Dehalobacteriaceae;g__Dehalobacterium	7.43218e-05	7.43218e-05	0.000445931	0.000222965			k__Bacteria;p__Firmicutes;c__Clostridia;o__Clostridiales;f__Clostridiaceae;g__Clostridium	k__Bacteria	p__Firmicutes	c__Clostridia	o__Clostridiales	f__Dehalobacteriaceae	g__Dehalobacterium	0.081754	0.141211	0.0222965	0.0148644
k__Bacteria;p__Firmicutes;c__Clostridia;o__Clostridiales;f__Lachnospiraceae;Other	0.00379041	0.00356745	0.00141211	0.000891862			k__Bacteria;p__Firmicutes;c__Clostridia;o__Clostridiales;f__Dehalobacteriaceae;g__Dehalobacterium	k__Bacteria	p__Firmicutes	c__Clostridia	o__Clostridiales	f__Lachnospiraceae	Other	0.00743218	0.00743218	0.0445931	0.0222965
k__Bacteria;p__Firmicutes;c__Clostridia;o__Clostridiales;f__Lachnospiraceae;g__	0.0447417	0.00616871	0.0118172	0.00587142			k__Bacteria;p__Firmicutes;c__Clostridia;o__Clostridiales;f__Lachnospiraceae;Other	k__Bacteria	p__Firmicutes	c__Clostridia	o__Clostridiales	f__Lachnospiraceae	g__	0.379041	0.356745	0.141211	0.0891862
k__Bacteria;p__Firmicutes;c__Clostridia;o__Clostridiales;f__Lachnospiraceae;g__Blautia	0.0352285	0.00081754	0.000891862	0.000743218			k__Bacteria;p__Firmicutes;c__Clostridia;o__Clostridiales;f__Lachnospiraceae;g__	k__Bacteria	p__Firmicutes	c__Clostridia	o__Clostridiales	f__Lachnospiraceae	g__Blautia	4.47417	0.616871	1.18172	0.587142
k__Bacteria;p__Firmicutes;c__Clostridia;o__Clostridiales;f__Lachnospiraceae;g__Coprococcus	0.00951319	0.0157562	0.00438499	0.00758082			k__Bacteria;p__Firmicutes;c__Clostridia;o__Clostridiales;f__Lachnospiraceae;g__Blautia	k__Bacteria	p__Firmicutes	c__Clostridia	o__Clostridiales	f__Lachnospiraceae	g__Coprococcus	3.52285	0.081754	0.0891862	0.0743218
k__Bacteria;p__Firmicutes;c__Clostridia;o__Clostridiales;f__Lachnospiraceae;g__Dorea	0.00252694	0.000371609	0.000743218	0.00148644			k__Bacteria;p__Firmicutes;c__Clostridia;o__Clostridiales;f__Lachnospiraceae;g__Coprococcus	k__Bacteria	p__Firmicutes	c__Clostridia	o__Clostridiales	f__Lachnospiraceae	g__Dorea	0.951319	1.57562	0.438499	0.758082
k__Bacteria;p__Firmicutes;c__Clostridia;o__Clostridiales;f__Lachnospiraceae;g__Lachnospira	0.000297287	0	0	7.43218e-05			k__Bacteria;p__Firmicutes;c__Clostridia;o__Clostridiales;f__Lachnospiraceae;g__Dorea	k__Bacteria	p__Firmicutes	c__Clostridia	o__Clostridiales	f__Lachnospiraceae	g__Lachnospira	0.252694	0.0371609	0.0743218	0.148644
k__Bacteria;p__Firmicutes;c__Clostridia;o__Clostridiales;f__Lachnospiraceae;g__Roseburia	0.00230398	7.43218e-05	0.000222965	7.43218e-05			k__Bacteria;p__Firmicutes;c__Clostridia;o__Clostridiales;f__Lachnospiraceae;g__Lachnospira	k__Bacteria	p__Firmicutes	c__Clostridia	o__Clostridiales	f__Lachnospiraceae	g__Roseburia	0.0297287	0	0	0.00743218
k__Bacteria;p__Firmicutes;c__Clostridia;o__Clostridiales;f__Lachnospiraceae;g__[Ruminococcus]	0.00379041	0.00200669	0.00133779	0.000891862			k__Bacteria;p__Firmicutes;c__Clostridia;o__Clostridiales;f__Lachnospiraceae;g__Roseburia	k__Bacteria	p__Firmicutes	c__Clostridia	o__Clostridiales	f__Lachnospiraceae	g__[Ruminococcus]	0.230398	0.00743218	0.0222965	0.00743218
k__Bacteria;p__Firmicutes;c__Clostridia;o__Clostridiales;f__Peptococcaceae;g__rc4-4	0.00200669	7.43218e-05	0.000297287	0.000520253			k__Bacteria;p__Firmicutes;c__Clostridia;o__Clostridiales;f__Lachnospiraceae;g__[Ruminococcus]	k__Bacteria	p__Firmicutes	c__Clostridia	o__Clostridiales	f__Peptococcaceae	g__rc4-4	0.379041	0.200669	0.133779	0.0891862
k__Bacteria;p__Firmicutes;c__Clostridia;o__Clostridiales;f__Peptostreptococcaceae;g__	0	0	0.000297287	7.43218e-05			k__Bacteria;p__Firmicutes;c__Clostridia;o__Clostridiales;f__Peptococcaceae;g__rc4-4	k__Bacteria	p__Firmicutes	c__Clostridia	o__Clostridiales	f__Peptostreptococcaceae	g__	0.200669	0.00743218	0.0297287	0.0520253
k__Bacteria;p__Firmicutes;c__Clostridia;o__Clostridiales;f__Ruminococcaceae;Other	0.00839836	0.0231141	0.00163508	0.00111483			k__Bacteria;p__Firmicutes;c__Clostridia;o__Clostridiales;f__Peptostreptococcaceae;g__	k__Bacteria	p__Firmicutes	c__Clostridia	o__Clostridiales	f__Ruminococcaceae	Other	0	0	0.0297287	0.00743218
k__Bacteria;p__Firmicutes;c__Clostridia;o__Clostridiales;f__Ruminococcaceae;g__	0.077369	0.0241546	0.0375325	0.0228168			k__Bacteria;p__Firmicutes;c__Clostridia;o__Clostridiales;f__Ruminococcaceae;Other	k__Bacteria	p__Firmicutes	c__Clostridia	o__Clostridiales	f__Ruminococcaceae	g__	0.839836	2.31141	0.163508	0.111483
k__Bacteria;p__Firmicutes;c__Clostridia;o__Clostridiales;f__Ruminococcaceae;g__Oscillospira	0.0173913	0.0312895	0.0282423	0.0179859			k__Bacteria;p__Firmicutes;c__Clostridia;o__Clostridiales;f__Ruminococcaceae;g__	k__Bacteria	p__Firmicutes	c__Clostridia	o__Clostridiales	f__Ruminococcaceae	g__Oscillospira	7.7369	2.41546	3.75325	2.28168
k__Bacteria;p__Firmicutes;c__Clostridia;o__Clostridiales;f__Ruminococcaceae;g__Ruminococcus	0.0132293	0.0232627	0.00661464	0.00876997			k__Bacteria;p__Firmicutes;c__Clostridia;o__Clostridiales;f__Ruminococcaceae;g__Oscillospira	k__Bacteria	p__Firmicutes	c__Clostridia	o__Clostridiales	f__Ruminococcaceae	g__Ruminococcus	1.73913	3.12895	2.82423	1.79859
k__Bacteria;p__Firmicutes;c__Clostridia;o__Clostridiales;f__Veillonellaceae;g__Anaerovibrio	0	0	0	7.43218e-05			k__Bacteria;p__Firmicutes;c__Clostridia;o__Clostridiales;f__Ruminococcaceae;g__Ruminococcus	k__Bacteria	p__Firmicutes	c__Clostridia	o__Clostridiales	f__Veillonellaceae	g__Anaerovibrio	1.32293	2.32627	0.661464	0.876997
k__Bacteria;p__Firmicutes;c__Clostridia;o__Clostridiales;f__Veillonellaceae;g__Phascolarctobacterium	0	7.43218e-05	0	0			k__Bacteria;p__Firmicutes;c__Clostridia;o__Clostridiales;f__Veillonellaceae;g__Anaerovibrio	k__Bacteria	p__Firmicutes	c__Clostridia	o__Clostridiales	f__Veillonellaceae	g__Phascolarctobacterium	0	0	0	0.00743218
k__Bacteria;p__Firmicutes;c__Clostridia;o__Clostridiales;f__[Mogibacteriaceae];g__	7.43218e-05	7.43218e-05	0	0.000222965			k__Bacteria;p__Firmicutes;c__Clostridia;o__Clostridiales;f__Veillonellaceae;g__Phascolarctobacterium	k__Bacteria	p__Firmicutes	c__Clostridia	o__Clostridiales	f__[Mogibacteriaceae]	g__	0	0.00743218	0	0
k__Bacteria;p__Firmicutes;c__Erysipelotrichi;o__Erysipelotrichales;f__Erysipelotrichaceae;g__	7.43218e-05	0.000148644	7.43218e-05	0.000966184			k__Bacteria;p__Firmicutes;c__Clostridia;o__Clostridiales;f__[Mogibacteriaceae];g__	k__Bacteria	p__Firmicutes	c__Erysipelotrichi	o__Erysipelotrichales	f__Erysipelotrichaceae	g__	0.00743218	0.00743218	0	0.0222965
k__Bacteria;p__Firmicutes;c__Erysipelotrichi;o__Erysipelotrichales;f__Erysipelotrichaceae;g__Allobaculum	0.00156076	0.000594575	0.00133779	0.000891862			k__Bacteria;p__Firmicutes;c__Erysipelotrichi;o__Erysipelotrichales;f__Erysipelotrichaceae;g__	k__Bacteria	p__Firmicutes	c__Erysipelotrichi	o__Erysipelotrichales	f__Erysipelotrichaceae	g__Allobaculum	0.00743218	0.0148644	0.00743218	0.0966184
k__Bacteria;p__Firmicutes;c__Erysipelotrichi;o__Erysipelotrichales;f__Erysipelotrichaceae;g__Holdemania	0.000668896	7.43218e-05	0.000148644	7.43218e-05			k__Bacteria;p__Firmicutes;c__Erysipelotrichi;o__Erysipelotrichales;f__Erysipelotrichaceae;g__Allobaculum	k__Bacteria	p__Firmicutes	c__Erysipelotrichi	o__Erysipelotrichales	f__Erysipelotrichaceae	g__Holdemania	0.156076	0.0594575	0.133779	0.0891862
k__Bacteria;p__Firmicutes;c__Erysipelotrichi;o__Erysipelotrichales;f__Erysipelotrichaceae;g__[Eubacterium]	0.000148644	0	7.43218e-05	7.43218e-05			k__Bacteria;p__Firmicutes;c__Erysipelotrichi;o__Erysipelotrichales;f__Erysipelotrichaceae;g__Holdemania	k__Bacteria	p__Firmicutes	c__Erysipelotrichi	o__Erysipelotrichales	f__Erysipelotrichaceae	g__[Eubacterium]	0.0668896	0.00743218	0.0148644	0.00743218
k__Bacteria;p__Fusobacteria;c__Fusobacteriia;o__Fusobacteriales;f__Fusobacteriaceae;g__Fusobacterium	0	0	7.43218e-05	0			k__Bacteria;p__Firmicutes;c__Erysipelotrichi;o__Erysipelotrichales;f__Erysipelotrichaceae;g__[Eubacterium]	k__Bacteria	p__Fusobacteria	c__Fusobacteriia	o__Fusobacteriales	f__Fusobacteriaceae	g__Fusobacterium	0.0148644	0	0.00743218	0.00743218
k__Bacteria;p__Proteobacteria;c__Alphaproteobacteria;o__RF32;f__;g__	0.00393906	0	0.00178372	0.00222965			k__Bacteria;p__Fusobacteria;c__Fusobacteriia;o__Fusobacteriales;f__Fusobacteriaceae;g__Fusobacterium	k__Bacteria	p__Proteobacteria	c__Alphaproteobacteria	o__RF32	f__	g__	0	0	0.00743218	0
k__Bacteria;p__Proteobacteria;c__Betaproteobacteria;o__Burkholderiales;f__Alcaligenaceae;g__Sutterella	0.000891862	0.00118915	0.00535117	0.00594575			k__Bacteria;p__Proteobacteria;c__Alphaproteobacteria;o__RF32;f__;g__	k__Bacteria	p__Proteobacteria	c__Betaproteobacteria	o__Burkholderiales	f__Alcaligenaceae	g__Sutterella	0.393906	0	0.178372	0.222965
k__Bacteria;p__Proteobacteria;c__Deltaproteobacteria;o__Desulfovibrionales;f__Desulfovibrionaceae;g__	0.000148644	0.000668896	0.00200669	7.43218e-05			k__Bacteria;p__Proteobacteria;c__Betaproteobacteria;o__Burkholderiales;f__Alcaligenaceae;g__Sutterella	k__Bacteria	p__Proteobacteria	c__Deltaproteobacteria	o__Desulfovibrionales	f__Desulfovibrionaceae	g__	0.0891862	0.118915	0.535117	0.594575
k__Bacteria;p__Proteobacteria;c__Deltaproteobacteria;o__Desulfovibrionales;f__Desulfovibrionaceae;g__Desulfovibrio	7.43218e-05	0	0	7.43218e-05			k__Bacteria;p__Proteobacteria;c__Deltaproteobacteria;o__Desulfovibrionales;f__Desulfovibrionaceae;g__	k__Bacteria	p__Proteobacteria	c__Deltaproteobacteria	o__Desulfovibrionales	f__Desulfovibrionaceae	g__Desulfovibrio	0.0148644	0.0668896	0.200669	0.00743218
k__Bacteria;p__Proteobacteria;c__Gammaproteobacteria;o__Enterobacteriales;f__Enterobacteriaceae;g__	0.000222965	0.000222965	0.000371609	0.000148644			k__Bacteria;p__Proteobacteria;c__Deltaproteobacteria;o__Desulfovibrionales;f__Desulfovibrionaceae;g__Desulfovibrio	k__Bacteria	p__Proteobacteria	c__Gammaproteobacteria	o__Enterobacteriales	f__Enterobacteriaceae	g__	0.00743218	0	0	0.00743218
k__Bacteria;p__Spirochaetes;c__Spirochaetes;o__Spirochaetales;f__Spirochaetaceae;g__Treponema	0	0	0.000222965	0			k__Bacteria;p__Proteobacteria;c__Gammaproteobacteria;o__Enterobacteriales;f__Enterobacteriaceae;g__	k__Bacteria	p__Spirochaetes	c__Spirochaetes	o__Spirochaetales	f__Spirochaetaceae	g__Treponema	0.0222965	0.0222965	0.0371609	0.0148644
k__Bacteria;p__Tenericutes;c__Mollicutes;o__RF39;f__;g__	0.00126347	0.00356745	0.000520253	0.00200669			k__Bacteria;p__Spirochaetes;c__Spirochaetes;o__Spirochaetales;f__Spirochaetaceae;g__Treponema	k__Bacteria	p__Tenericutes	c__Mollicutes	o__RF39	f__	g__	0	0	0.0222965	0
k__Bacteria;p__Verrucomicrobia;c__Verrucomicrobiae;o__Verrucomicrobiales;f__Verrucomicrobiaceae;g__Akkermansia	0	0.000148644	7.43218e-05	0.000371609			k__Bacteria;p__Tenericutes;c__Mollicutes;o__RF39;f__;g__	k__Bacteria	p__Verrucomicrobia	c__Verrucomicrobiae	o__Verrucomicrobiales	f__Verrucomicrobiaceae	g__Akkermansia	0.126347	0.356745	0.0520253	0.200669
							k__Bacteria;p__Verrucomicrobia;c__Verrucomicrobiae;o__Verrucomicrobiales;f__Verrucomicrobiaceae;g__Akkermansia							0	0.0148644	0.00743218	0.0371609

## Sheet: speceis table
# Constructed from biom file
#OTU ID	OLETF	HG	LETO	MET
Unassigned;Other;Other;Other;Other;Other;Other	0.00824972	0.00787811	0.00780379	0.0115199
k__Bacteria;Other;Other;Other;Other;Other;Other	0	7.43218e-05	0	7.43218e-05
k__Bacteria;p__Actinobacteria;c__Actinobacteria;o__Actinomycetales;f__Corynebacteriaceae;g__Corynebacterium;s__	7.43218e-05	0	0	0
k__Bacteria;p__Actinobacteria;c__Coriobacteriia;o__Coriobacteriales;f__Coriobacteriaceae;g__Adlercreutzia;s__	0	7.43218e-05	0.000445931	0
k__Bacteria;p__Bacteroidetes;c__Bacteroidia;o__Bacteroidales;Other;Other;Other	0.000222965	7.43218e-05	7.43218e-05	0
k__Bacteria;p__Bacteroidetes;c__Bacteroidia;o__Bacteroidales;f__;g__;s__	0.00148644	0.00356745	0.000445931	0.000520253
k__Bacteria;p__Bacteroidetes;c__Bacteroidia;o__Bacteroidales;f__Bacteroidaceae;g__Bacteroides;s__	0.174136	0.132367	0.246674	0.0916388
k__Bacteria;p__Bacteroidetes;c__Bacteroidia;o__Bacteroidales;f__Bacteroidaceae;g__Bacteroides;s__acidifaciens	0.00602007	0.00245262	0.00795243	0.00668896
k__Bacteria;p__Bacteroidetes;c__Bacteroidia;o__Bacteroidales;f__Bacteroidaceae;g__Bacteroides;s__fragilis	0	0.000148644	0	0
k__Bacteria;p__Bacteroidetes;c__Bacteroidia;o__Bacteroidales;f__Bacteroidaceae;g__Bacteroides;s__uniformis	0.000445931	0.000445931	0.000594575	0.000222965
k__Bacteria;p__Bacteroidetes;c__Bacteroidia;o__Bacteroidales;f__Porphyromonadaceae;g__Parabacteroides;s__	0.00163508	0.00995912	0.00304719	0.00274991
k__Bacteria;p__Bacteroidetes;c__Bacteroidia;o__Bacteroidales;f__Porphyromonadaceae;g__Porphyromonas;s__endodontalis	0	0	7.43218e-05	7.43218e-05
k__Bacteria;p__Bacteroidetes;c__Bacteroidia;o__Bacteroidales;f__Prevotellaceae;Other;Other	0	0	7.43218e-05	0
k__Bacteria;p__Bacteroidetes;c__Bacteroidia;o__Bacteroidales;f__Prevotellaceae;g__;s__	0.0253437	0.00616871	0.00728354	0.00951319
k__Bacteria;p__Bacteroidetes;c__Bacteroidia;o__Bacteroidales;f__Prevotellaceae;g__Prevotella;s__	0.0282423	0.0460052	0.0149387	0.0358974
k__Bacteria;p__Bacteroidetes;c__Bacteroidia;o__Bacteroidales;f__Rikenellaceae;g__;s__	0.00906726	0.00572278	0.00587142	0.00854701
k__Bacteria;p__Bacteroidetes;c__Bacteroidia;o__Bacteroidales;f__S24-7;g__;s__	0.463694	0.531401	0.342401	0.559866
k__Bacteria;p__Bacteroidetes;c__Bacteroidia;o__Bacteroidales;f__[Odoribacteraceae];g__Odoribacter;s__	0.00215533	0.00193237	0.000371609	0.00133779
k__Bacteria;p__Bacteroidetes;c__Bacteroidia;o__Bacteroidales;f__[Paraprevotellaceae];g__CF231;s__	7.43218e-05	7.43218e-05	0	0
k__Bacteria;p__Bacteroidetes;c__Bacteroidia;o__Bacteroidales;f__p-2534-18B5;g__;s__	0	0	0	7.43218e-05
k__Bacteria;p__Deferribacteres;c__Deferribacteres;o__Deferribacterales;f__Deferribacteraceae;g__Mucispirillum;s__schaedleri	0.00215533	0	0.00133779	0.000148644
k__Bacteria;p__Firmicutes;c__Bacilli;o__Bacillales;f__Bacillaceae;g__;s__	0.000148644	0.00081754	0.00111483	0.000222965
k__Bacteria;p__Firmicutes;c__Bacilli;o__Bacillales;f__Planococcaceae;Other;Other	7.43218e-05	0	0	0
k__Bacteria;p__Firmicutes;c__Bacilli;o__Bacillales;f__Planococcaceae;g__;s__	0.000148644	0	0	0.000222965
k__Bacteria;p__Firmicutes;c__Bacilli;o__Bacillales;f__Planococcaceae;g__Lysinibacillus;s__boronitolerans	0	0	0	0.000148644
k__Bacteria;p__Firmicutes;c__Bacilli;o__Bacillales;f__Planococcaceae;g__Rummeliibacillus;s__	7.43218e-05	0	0	7.43218e-05
k__Bacteria;p__Firmicutes;c__Bacilli;o__Lactobacillales;f__Lactobacillaceae;g__Lactobacillus;s__	0.0047566	0.00631735	0.00483092	0.00267559
k__Bacteria;p__Firmicutes;c__Bacilli;o__Lactobacillales;f__Lactobacillaceae;g__Lactobacillus;s__reuteri	0	0.000148644	0.000222965	0
k__Bacteria;p__Firmicutes;c__Bacilli;o__Lactobacillales;f__Streptococcaceae;g__Lactococcus;s__garvieae	0	7.43218e-05	0	0
k__Bacteria;p__Firmicutes;c__Bacilli;o__Lactobacillales;f__Streptococcaceae;g__Streptococcus;s__	7.43218e-05	0	0.000222965	7.43218e-05
k__Bacteria;p__Firmicutes;c__Bacilli;o__Turicibacterales;f__Turicibacteraceae;g__Turicibacter;s__	0.000297287	0.00483092	0.000148644	0.00958751
k__Bacteria;p__Firmicutes;c__Clostridia;o__Clostridiales;Other;Other;Other	0.0098848	0.0472687	0.0057971	0.0414716
k__Bacteria;p__Firmicutes;c__Clostridia;o__Clostridiales;f__;g__;s__	0.105017	0.06466	0.107395	0.0613155
k__Bacteria;p__Firmicutes;c__Clostridia;o__Clostridiales;f__Christensenellaceae;g__;s__	0.00304719	0.00230398	0.00698625	0.00245262
k__Bacteria;p__Firmicutes;c__Clostridia;o__Clostridiales;f__Clostridiaceae;Other;Other	0.000148644	0	0	0
k__Bacteria;p__Firmicutes;c__Clostridia;o__Clostridiales;f__Clostridiaceae;g__;s__	0.0144184	0.0428094	0.00334448	0.0447417
k__Bacteria;p__Firmicutes;c__Clostridia;o__Clostridiales;f__Clostridiaceae;g__Clostridium;s__	0.00141211	0.000148644	0.00081754	0.000222965
k__Bacteria;p__Firmicutes;c__Clostridia;o__Clostridiales;f__Dehalobacteriaceae;g__Dehalobacterium;s__	7.43218e-05	0.000222965	7.43218e-05	0.000445931
k__Bacteria;p__Firmicutes;c__Clostridia;o__Clostridiales;f__Lachnospiraceae;Other;Other	0.00356745	0.000891862	0.00379041	0.00141211
k__Bacteria;p__Firmicutes;c__Clostridia;o__Clostridiales;f__Lachnospiraceae;g__;s__	0.00616871	0.00587142	0.0447417	0.0118172
k__Bacteria;p__Firmicutes;c__Clostridia;o__Clostridiales;f__Lachnospiraceae;g__Blautia;s__	0.000743218	0.000371609	0.0308436	0.000743218
k__Bacteria;p__Firmicutes;c__Clostridia;o__Clostridiales;f__Lachnospiraceae;g__Blautia;s__producta	7.43218e-05	0.000371609	0.00438499	0.000148644
k__Bacteria;p__Firmicutes;c__Clostridia;o__Clostridiales;f__Lachnospiraceae;g__Coprococcus;s__	0.0157562	0.00758082	0.00951319	0.00438499
k__Bacteria;p__Firmicutes;c__Clostridia;o__Clostridiales;f__Lachnospiraceae;g__Dorea;s__	0.000371609	0.00148644	0.00252694	0.000743218
k__Bacteria;p__Firmicutes;c__Clostridia;o__Clostridiales;f__Lachnospiraceae;g__Lachnospira;s__	0	7.43218e-05	0.000297287	0
k__Bacteria;p__Firmicutes;c__Clostridia;o__Clostridiales;f__Lachnospiraceae;g__Roseburia;s__	7.43218e-05	7.43218e-05	0.00230398	0.000222965
k__Bacteria;p__Firmicutes;c__Clostridia;o__Clostridiales;f__Lachnospiraceae;g__[Ruminococcus];Other	7.43218e-05	0	7.43218e-05	7.43218e-05
k__Bacteria;p__Firmicutes;c__Clostridia;o__Clostridiales;f__Lachnospiraceae;g__[Ruminococcus];s__gnavus	0.00193237	0.000891862	0.00371609	0.00126347
k__Bacteria;p__Firmicutes;c__Clostridia;o__Clostridiales;f__Peptococcaceae;g__rc4-4;s__	7.43218e-05	0.000520253	0.00200669	0.000297287
k__Bacteria;p__Firmicutes;c__Clostridia;o__Clostridiales;f__Peptostreptococcaceae;g__;s__	0	7.43218e-05	0	0.000297287
k__Bacteria;p__Firmicutes;c__Clostridia;o__Clostridiales;f__Ruminococcaceae;Other;Other	0.0231141	0.00111483	0.00839836	0.00163508
k__Bacteria;p__Firmicutes;c__Clostridia;o__Clostridiales;f__Ruminococcaceae;g__;s__	0.0241546	0.0228168	0.077369	0.0375325
k__Bacteria;p__Firmicutes;c__Clostridia;o__Clostridiales;f__Ruminococcaceae;g__Oscillospira;s__	0.0312895	0.0179859	0.0173913	0.0282423
k__Bacteria;p__Firmicutes;c__Clostridia;o__Clostridiales;f__Ruminococcaceae;g__Ruminococcus;Other	0.000148644	7.43218e-05	0.00327016	0
k__Bacteria;p__Firmicutes;c__Clostridia;o__Clostridiales;f__Ruminococcaceae;g__Ruminococcus;s__	0.0231141	0.00564846	0.00995912	0.006466
k__Bacteria;p__Firmicutes;c__Clostridia;o__Clostridiales;f__Ruminococcaceae;g__Ruminococcus;s__flavefaciens	0	0.00304719	0	0.000148644
k__Bacteria;p__Firmicutes;c__Clostridia;o__Clostridiales;f__Veillonellaceae;g__Anaerovibrio;s__	0	7.43218e-05	0	0
k__Bacteria;p__Firmicutes;c__Clostridia;o__Clostridiales;f__Veillonellaceae;g__Phascolarctobacterium;s__	7.43218e-05	0	0	0
k__Bacteria;p__Firmicutes;c__Clostridia;o__Clostridiales;f__[Mogibacteriaceae];g__;s__	7.43218e-05	0.000222965	7.43218e-05	0
k__Bacteria;p__Firmicutes;c__Erysipelotrichi;o__Erysipelotrichales;f__Erysipelotrichaceae;g__;s__	0.000148644	0.000966184	7.43218e-05	7.43218e-05
k__Bacteria;p__Firmicutes;c__Erysipelotrichi;o__Erysipelotrichales;f__Erysipelotrichaceae;g__Allobaculum;s__	0.000594575	0.000891862	0.00156076	0.00133779
k__Bacteria;p__Firmicutes;c__Erysipelotrichi;o__Erysipelotrichales;f__Erysipelotrichaceae;g__Holdemania;s__	7.43218e-05	7.43218e-05	0.000668896	0.000148644
k__Bacteria;p__Firmicutes;c__Erysipelotrichi;o__Erysipelotrichales;f__Erysipelotrichaceae;g__[Eubacterium];s__dolichum	0	7.43218e-05	0.000148644	7.43218e-05
k__Bacteria;p__Fusobacteria;c__Fusobacteriia;o__Fusobacteriales;f__Fusobacteriaceae;g__Fusobacterium;s__	0	0	0	7.43218e-05
k__Bacteria;p__Proteobacteria;c__Alphaproteobacteria;o__RF32;f__;g__;s__	0	0.00222965	0.00393906	0.00178372
k__Bacteria;p__Proteobacteria;c__Betaproteobacteria;o__Burkholderiales;f__Alcaligenaceae;g__Sutterella;s__	0.00118915	0.00594575	0.000891862	0.00535117
k__Bacteria;p__Proteobacteria;c__Deltaproteobacteria;o__Desulfovibrionales;f__Desulfovibrionaceae;g__;s__	0.000668896	7.43218e-05	0.000148644	0.00200669
k__Bacteria;p__Proteobacteria;c__Deltaproteobacteria;o__Desulfovibrionales;f__Desulfovibrionaceae;g__Desulfovibrio;s__	0	7.43218e-05	7.43218e-05	0
k__Bacteria;p__Proteobacteria;c__Gammaproteobacteria;o__Enterobacteriales;f__Enterobacteriaceae;g__;s__	0.000222965	0.000148644	0.000222965	0.000371609
k__Bacteria;p__Spirochaetes;c__Spirochaetes;o__Spirochaetales;f__Spirochaetaceae;g__Treponema;s__	0	0	0	0.000222965
k__Bacteria;p__Tenericutes;c__Mollicutes;o__RF39;f__;g__;s__	0.00356745	0.00200669	0.00126347	0.000520253
k__Bacteria;p__Verrucomicrobia;c__Verrucomicrobiae;o__Verrucomicrobiales;f__Verrucomicrobiaceae;g__Akkermansia;s__muciniphila	0.000148644	0.000371609	0	7.43218e-05
